# Supplementary material
Source: Springer Nature journal article supplement (https://www.springerprofessional.de/resource/supplementary/13638_2011_197_MOESM3_ESM.pdf/11897240)

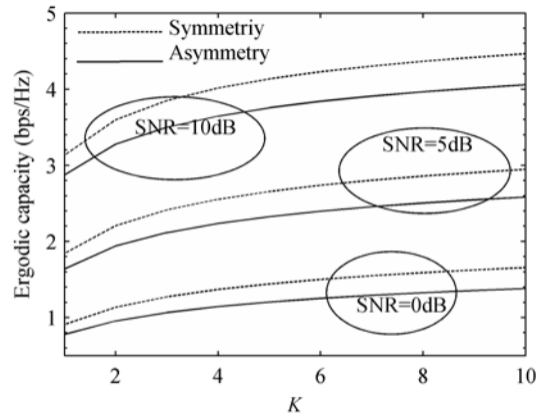

(a) TWOR-AFNC-Dir systems

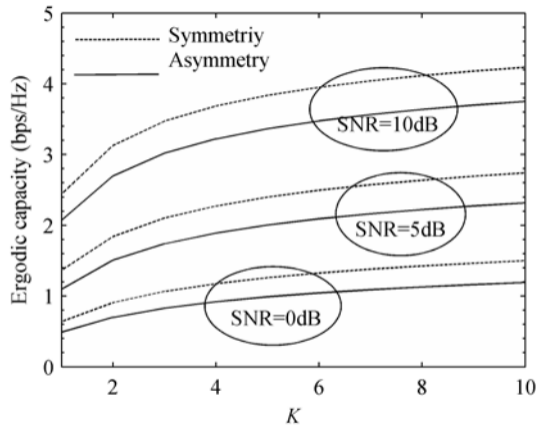

(b) TWOR-AFNC-Nodir systems

Supplement: MOESM3 [file 11897240]
